# Supplementary material for: Multi-omic Characterization of Pancreatic Ductal Adenocarcinoma Relates CXCR4 mRNA Expression Levels to Potential Clinical Targets
Source: PubMed Central journal article supplement — Clin Cancer Res. 2022 Sep 16;28(22):4957–67. doi: 10.1158/1078-0432.CCR-22-0275 (PMC9660543; doi:10.1158/1078-0432.ccr-22-0275), 2022-09-16
Supplement: ccr-22-0275_supplementary_figure_s1_suppfs1.pdf [file ccr-22-0275_supplementary_figure_s1_suppfs1.pdf]

**A****Participant SOM clustering**

Training process

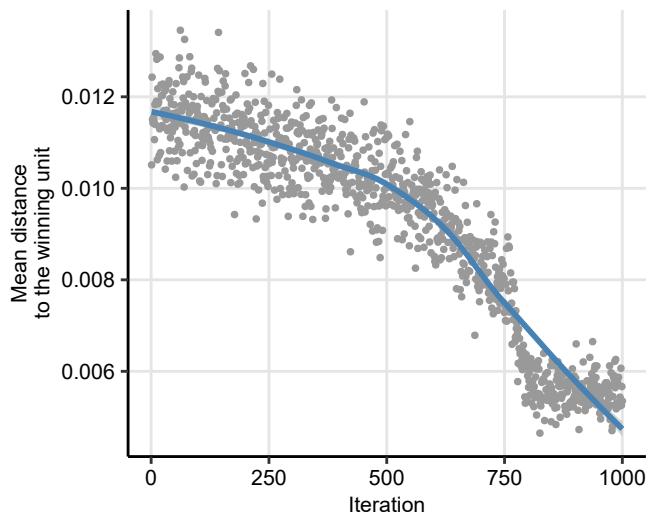**B****Clustering of the SOM nodes**

Hierarchical clustering, euclidean distance, ward.D2 metl

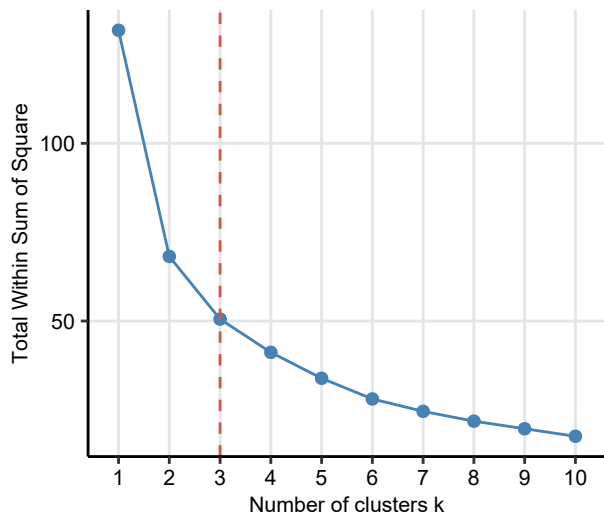

Observations: n = 49

Variables: n = 10

**C****Clustering of the SOM nodes**

Hierarchical clustering, euclidean distance, ward.D2 metl

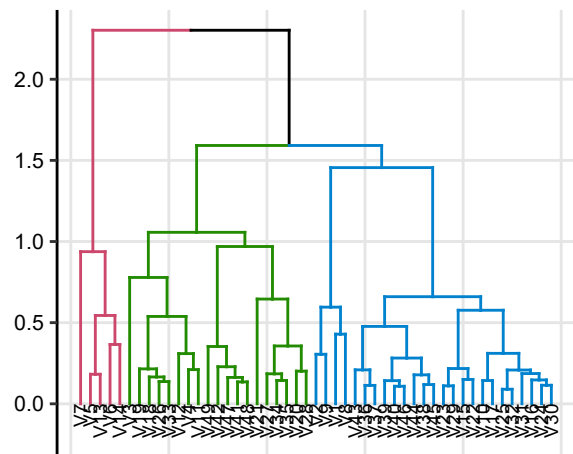

Observations: n = 49

Variables: n = 10
