# Supplementary material for: Multi-omic Characterization of Pancreatic Ductal Adenocarcinoma Relates CXCR4 mRNA Expression Levels to Potential Clinical Targets
Source: PubMed Central journal article supplement — Clin Cancer Res. 2022 Sep 16;28(22):4957–67. doi: 10.1158/1078-0432.CCR-22-0275 (PMC9660543; doi:10.1158/1078-0432.ccr-22-0275), 2022-09-16
Supplement: ccr-22-0275_supplementary_figure_s2_suppfs2.pdf [file ccr-22-0275_supplementary_figure_s2_suppfs2.pdf]

### Macrophage M1

p < 0.001

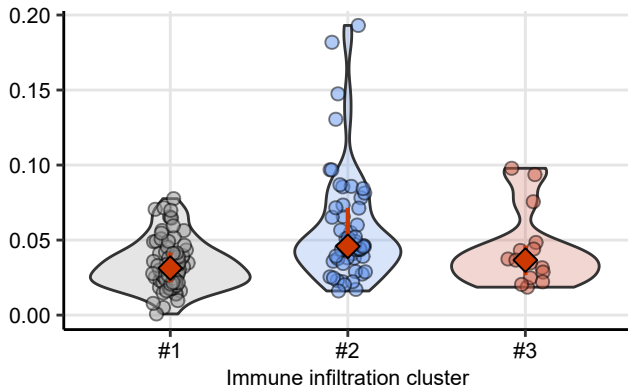

#1: n = 79, #2: n = 53, #3: n = 15

### Macrophage M2

p < 0.001

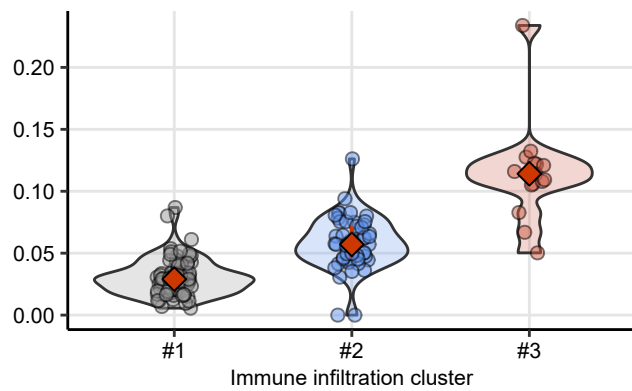

#1: n = 79, #2: n = 53, #3: n = 15

### T cell CD4+ (non-regulatory)

ns (p = 0.94)

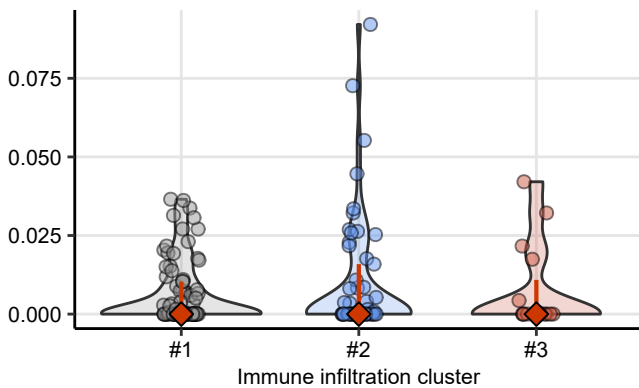

#1: n = 79, #2: n = 53, #3: n = 15

### T cell regulatory (Tregs)

p < 0.001

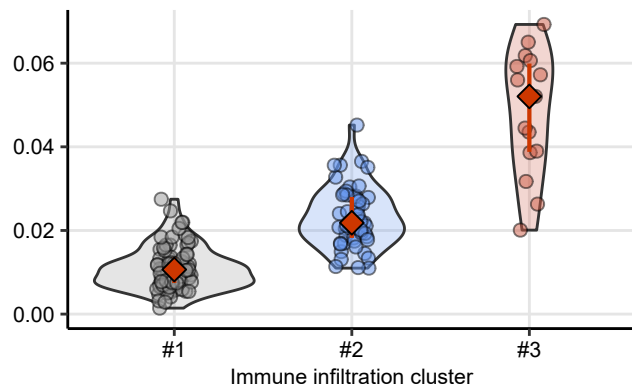

#1: n = 79, #2: n = 53, #3: n = 15

### T cell CD8+

p < 0.001

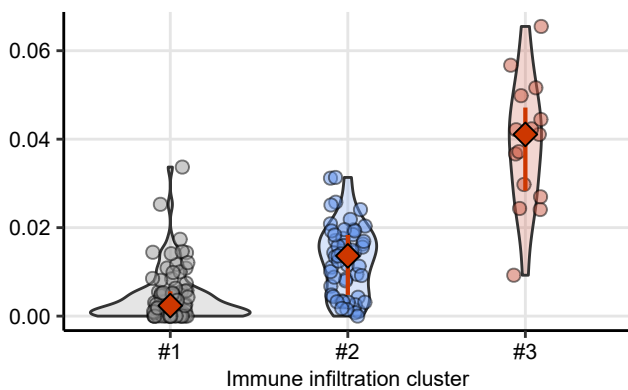

#1: n = 79, #2: n = 53, #3: n = 15

### uncharacterized cell

p < 0.001

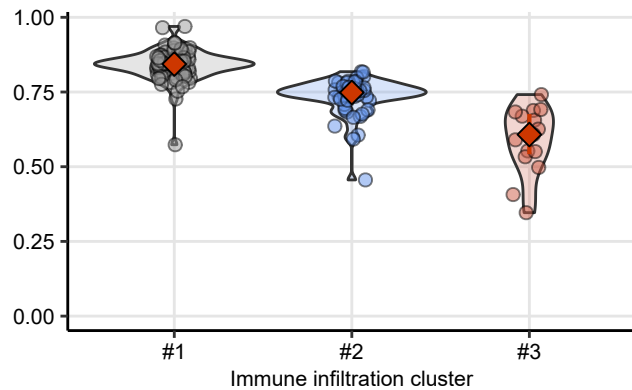

#1: n = 79, #2: n = 53, #3: n = 15
