# Supplementary material for: Multi-omic Characterization of Pancreatic Ductal Adenocarcinoma Relates CXCR4 mRNA Expression Levels to Potential Clinical Targets
Source: PubMed Central journal article supplement — Clin Cancer Res. 2022 Sep 16;28(22):4957–67. doi: 10.1158/1078-0432.CCR-22-0275 (PMC9660543; doi:10.1158/1078-0432.ccr-22-0275), 2022-09-16
Supplement: ccr-22-0275_supplementary_figure_s3_suppfs3.pdf [file ccr-22-0275_supplementary_figure_s3_suppfs3.pdf]

# Differential gene expression

Differential gene expression

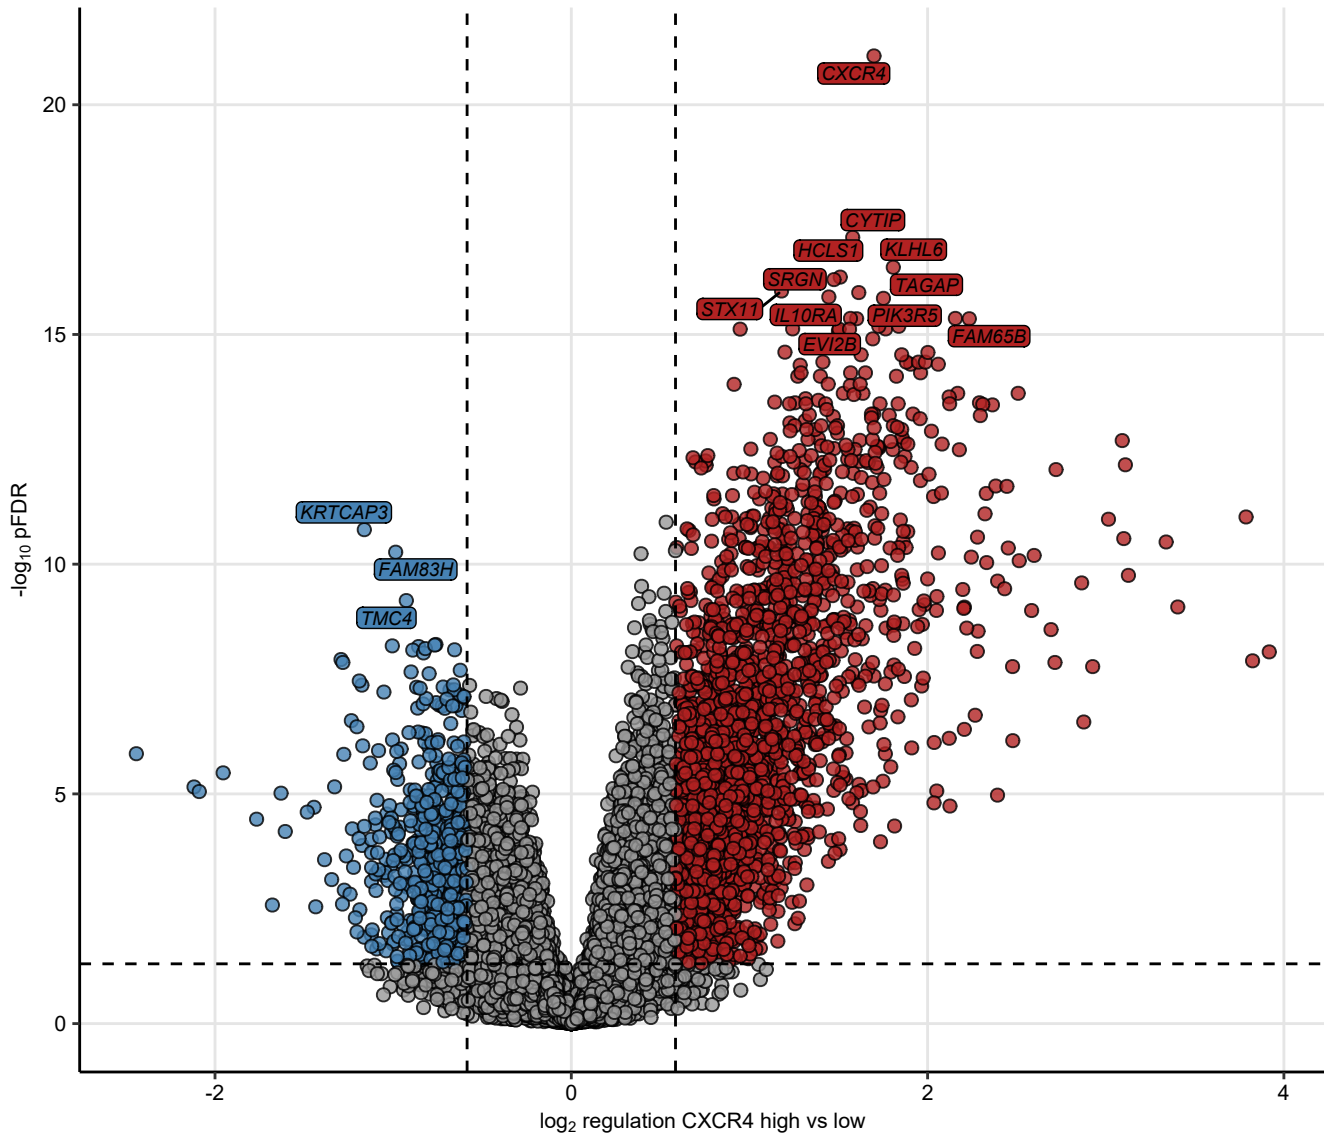

Regulation ● upregulated ● downregulated ● ns

upregulated: n = 2332, downregulated: n = 605
