# Supplementary figures and images for: Multi-omic Characterization of Pancreatic Ductal Adenocarcinoma Relates CXCR4 mRNA Expression Levels to Potential Clinical Targets
Source: PubMed Central journal article supplement — Clin Cancer Res. 2022 Sep 16;28(22):4957–67. doi: 10.1158/1078-0432.CCR-22-0275 (PMC9660543; doi:10.1158/1078-0432.ccr-22-0275), 2022-09-16

### Pathway perturbation analysis: top 20 pathways

CXCR4 high vs low tumors, SPIA

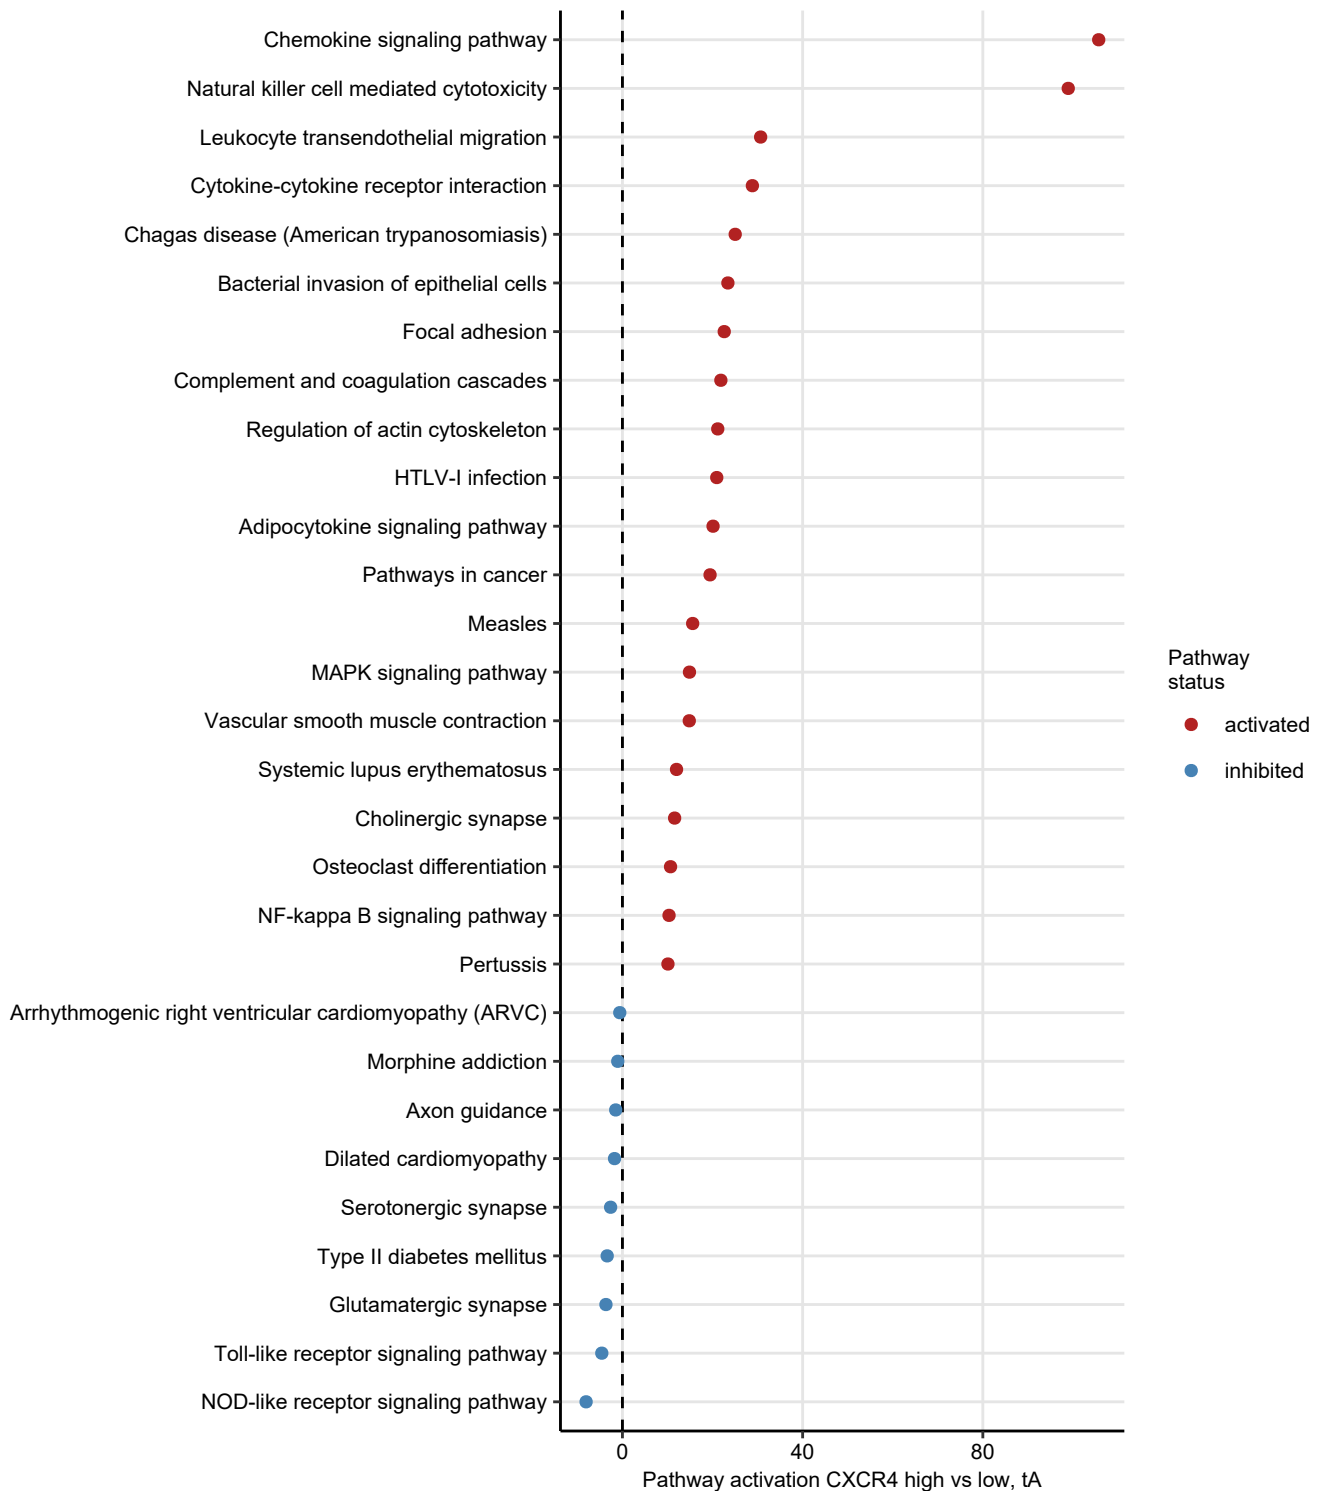

Supplement: ccr-22-0275_supplementary_figure_s4_suppfs4.pdf [file ccr-22-0275_supplementary_figure_s4_suppfs4.pdf]
